# Supplementary material for: Crystal structures and DFT calculations of new chlorido-dimethylsulfoxide-MIII (M = Ir, Ru, Rh) complexes with the N-pyrazolyl pyrimidine donor ligand: kinetic vs. thermodynamic isomers
Source: Royal Society of Chemistry journal article supplement (doi:10.1039/c3dt52700j), 2014-01-01
Supplement: c3dt52700j1.pdf [file c3dt52700j1.pdf]

## Supporting Information for manuscript:

# Crystal Structures and DFT Calculations of New chlorido-dimethylsulfoxide- $M^{III}$ ( $M = Ir, Ru, Rh$ ) complexes with N-Pyrazolyl Pyrimidine donor ligand: Kinetic vs thermodynamic isomers.

María M. Cánaves,<sup>[a]</sup> María I. Cabra,<sup>[a]</sup> Antonio Bauzá,<sup>[a]</sup> Pablo Cañellas,<sup>[a]</sup> Kika Sánchez,<sup>[a]</sup> Francisca Orvay,<sup>[a]</sup> Angel García-Raso,<sup>[a]\*</sup> Juan J. Fiol,<sup>[a]</sup> Angel Terrón,<sup>[a]</sup> Miquel Barceló-Oliver,<sup>[a]</sup> Pablo Ballester,<sup>[b]</sup> Ignasi Mata,<sup>[c]</sup> Elies Molins,<sup>[c]</sup> Firasat Hussain,<sup>[d]</sup> Antonio Frontera,<sup>[a],\*</sup>

<sup>a</sup>Departament de Química, Universitat de les Illes Balears, Crta. de Valldemossa km 7.5, 07122 Palma de Mallorca (Balears), Spain; E-mail: toni.frontera@uib.es

<sup>b</sup>Institute of Chemical Research of Catalonia (ICIQ), Avda. Països Catalans 16, 43007 Tarragona, Spain and Catalan Institution for Research and Advanced Studies (ICREA), Passeig Lluís Companys, 23, 08018, Barcelona, Spain.

<sup>c</sup>Institut de Ciència de Materials de Barcelona (CSIC), Campus UAB, 08193 Bellaterra, Spain.

<sup>d</sup>Department of Chemistry (Nanoscience and Nanotechnology), University of Delhi (North Campus), Delhi-110 007, India.

## Table of contents:

|                                                                        |        |
|------------------------------------------------------------------------|--------|
| 1. Plots of the experimental and calculated powder XRD profiles        | Pag 2  |
| 2. Experimental details for the conversion of <b>1b</b> to <b>1a</b> . | Pag. 6 |
| 3. Figures S1-S3                                                       | Pag. 7 |
| 4. Cartesian coordinates of all optimized compounds                    | Pag. 8 |

## 1. Plots of the experimental and calculated powder XRD profiles

The calculated powder XRD profiles have been obtained using Mercury from the cif files.

### 1.1 compound 1a:

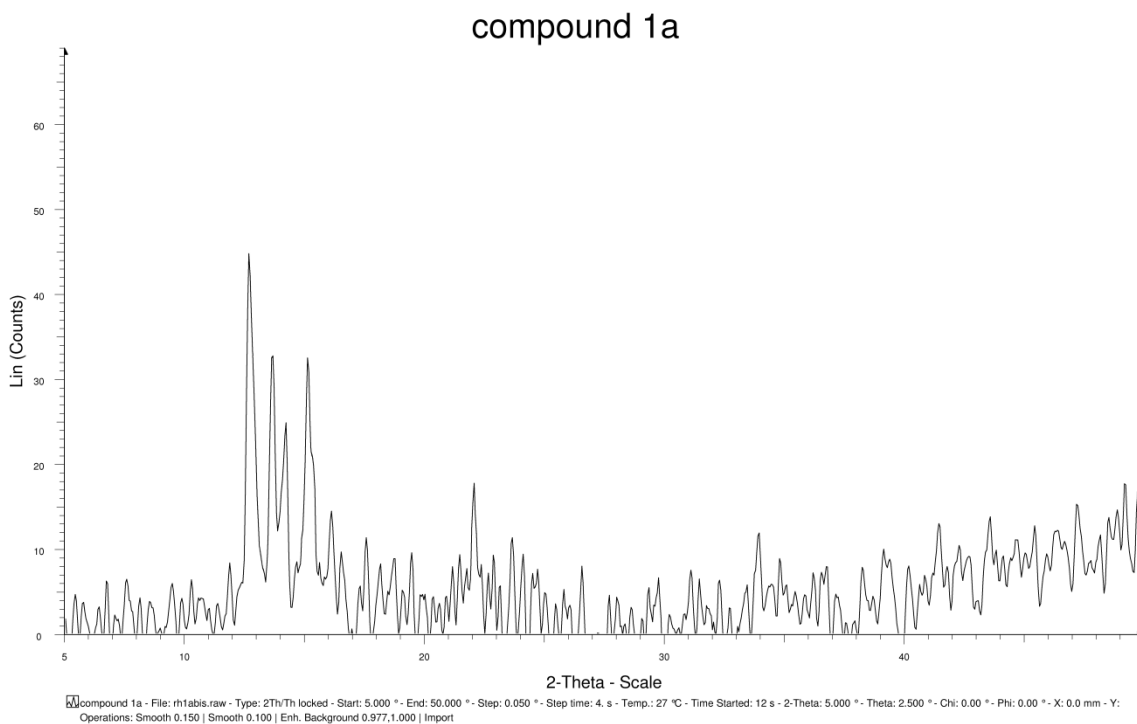

**Fig S1.** Plot of the experimental powder XRD profile of **1a**.

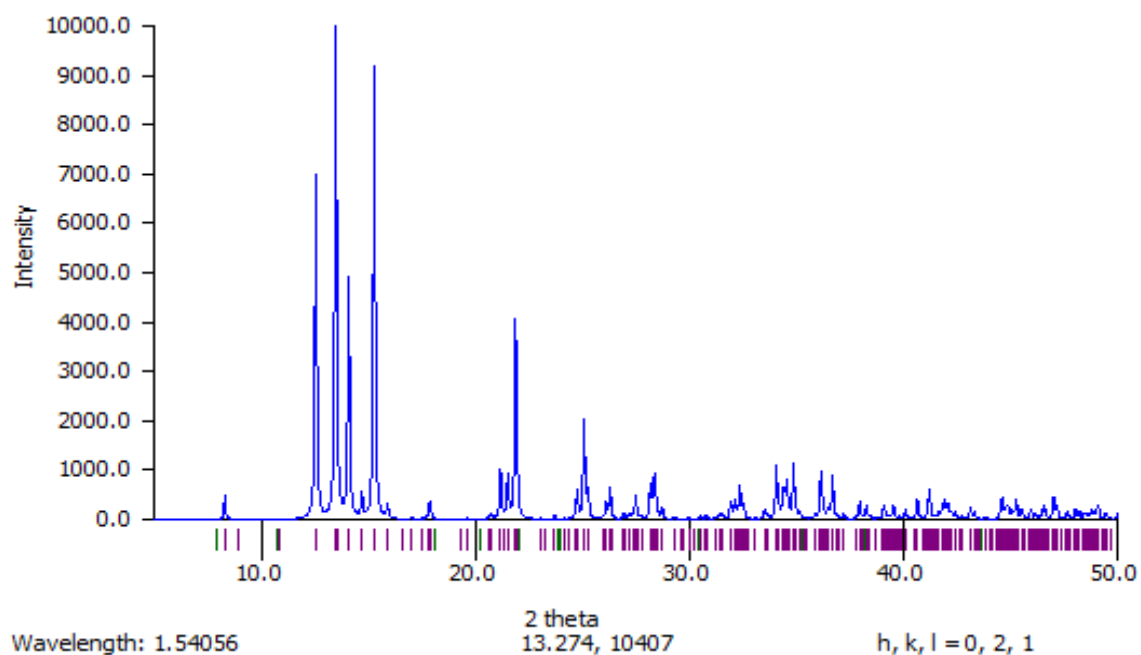

**Fig S2.** Plot of the calculated powder XRD profile of **1a**.

## 1.2 compound 1b:

compound 1b

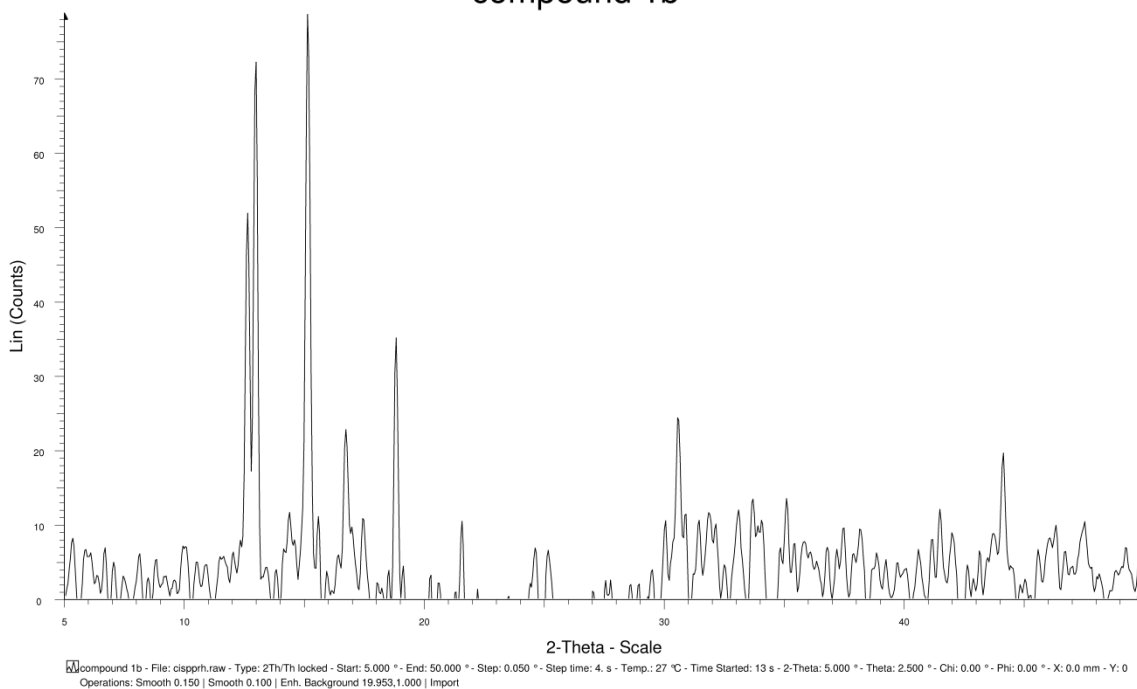

Fig S3. Plot of the experimental powder XRD profile of **1b**.

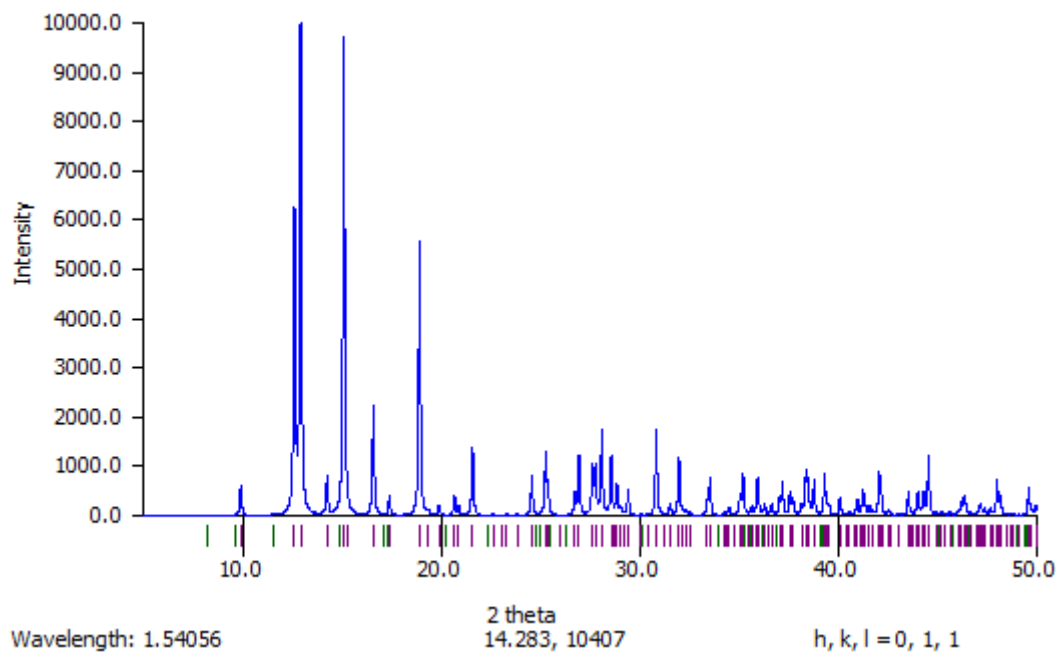

Fig S4. Plot of the calculated powder XRD profile of **1b**.

### 1.3 compound 2a:

compound 2a

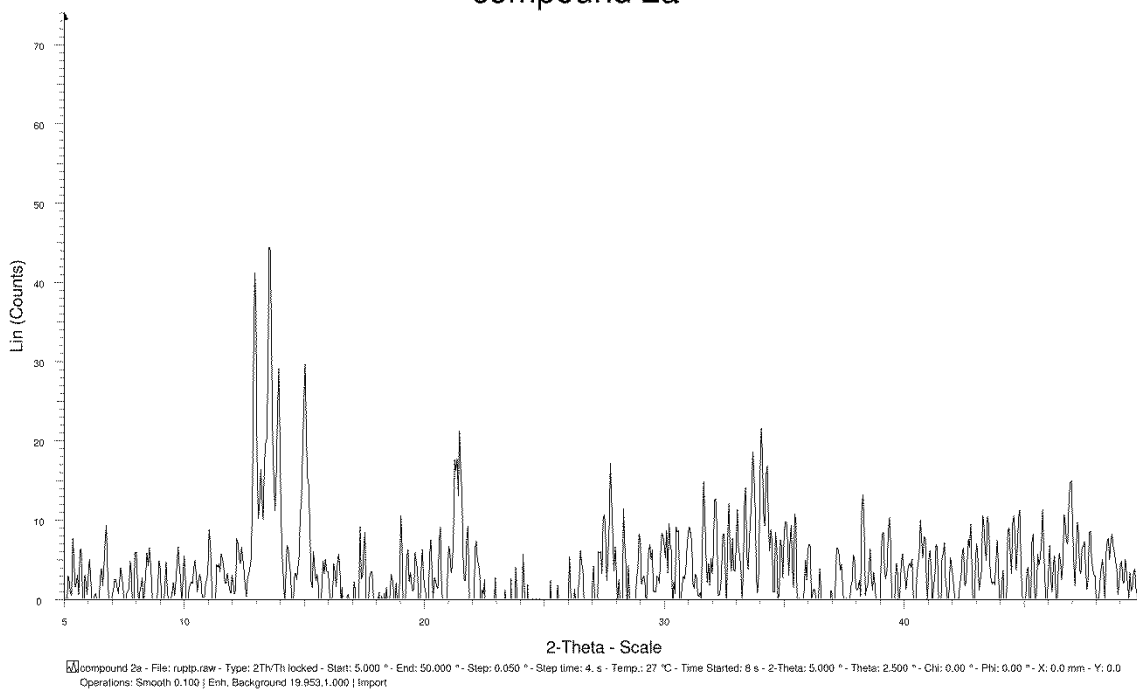

Fig S5. Plot of the experimental powder XRD profile of 2a.

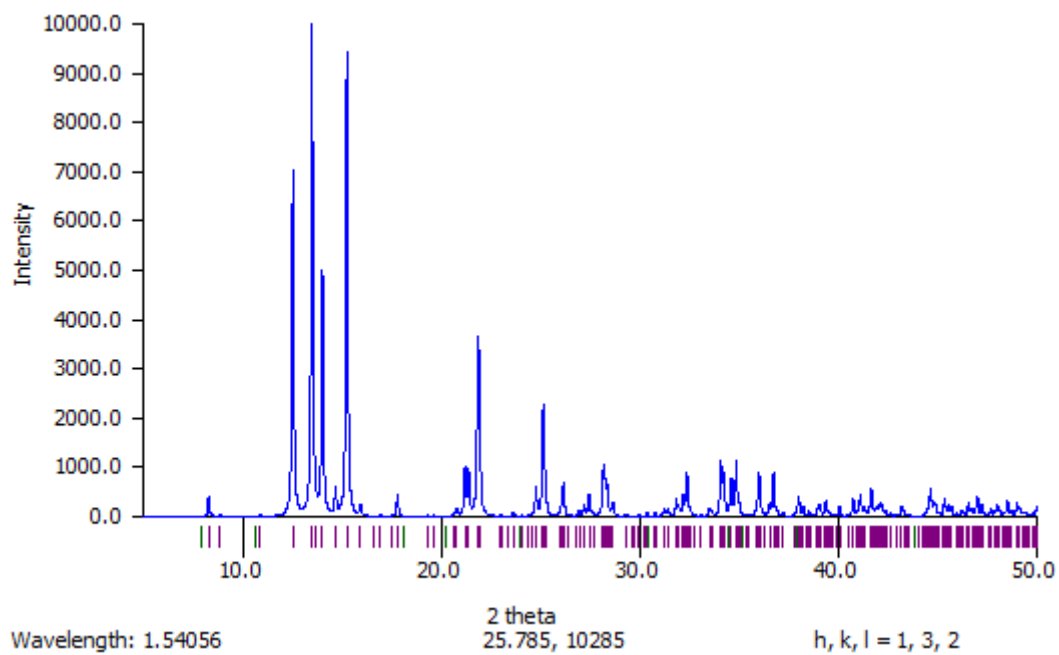

Fig S6. Plot of the calculated powder XRD profile of 2a.

#### 1.4 compound 2b:

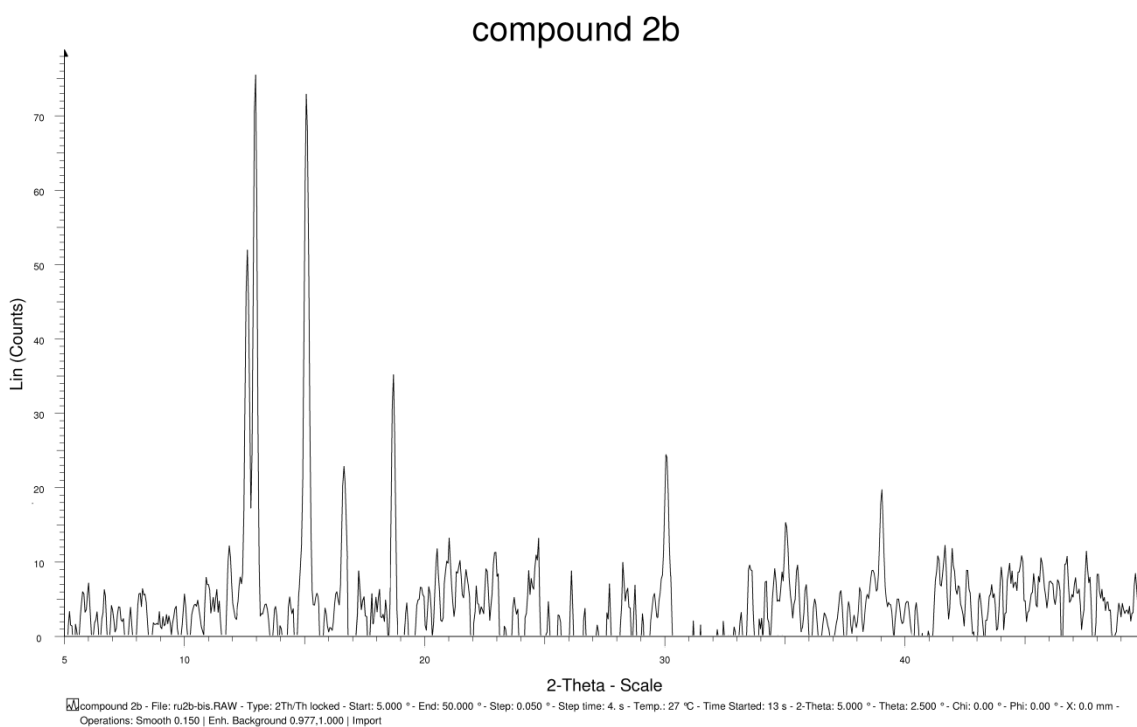

**Fig S7.** Plot of the experimental powder XRD profile of **2b**.

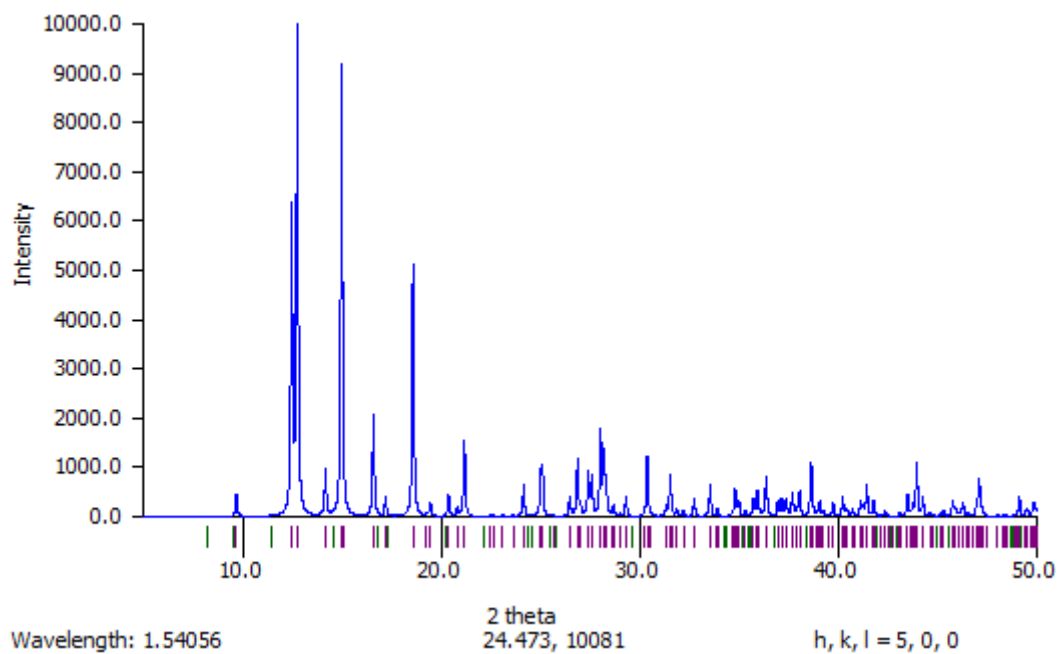

**Fig S8.** Plot of the calculated powder XRD profile of **2b**.

## 2. Conversion of 1b to 1a

A solution of 15 mg (0.1 mmols) of *pyrapyr* in 10 ml of EtOH was added to a solution of 48 mg (0.1 mmols) of  $[\text{H}(\text{DMSO})_2][\text{trans-RhCl}_4(\text{DMSO})_2]$  in 5 ml of EtOH. The suspension was stirred during 10 h at room temperature and a precipitate was formed that corresponds to 1b (see Figure S1, top), then this suspension is refluxed during 3h with constant stirring. The resulting clear solution was cooled at room temperature, and **1a** precipitates from the reaction mixture (see Figure S1, bottom). The reaction cannot be followed by  $^1\text{H-NMR}$  because of the low solubility of both the initial and final products in the reaction solvent (EtOH). The  $^1\text{H-NMR}$  spectra have been done in DMSO solvent. In the next Figure we represent the initial (just before heating) and final NMR spectra for this reaction.

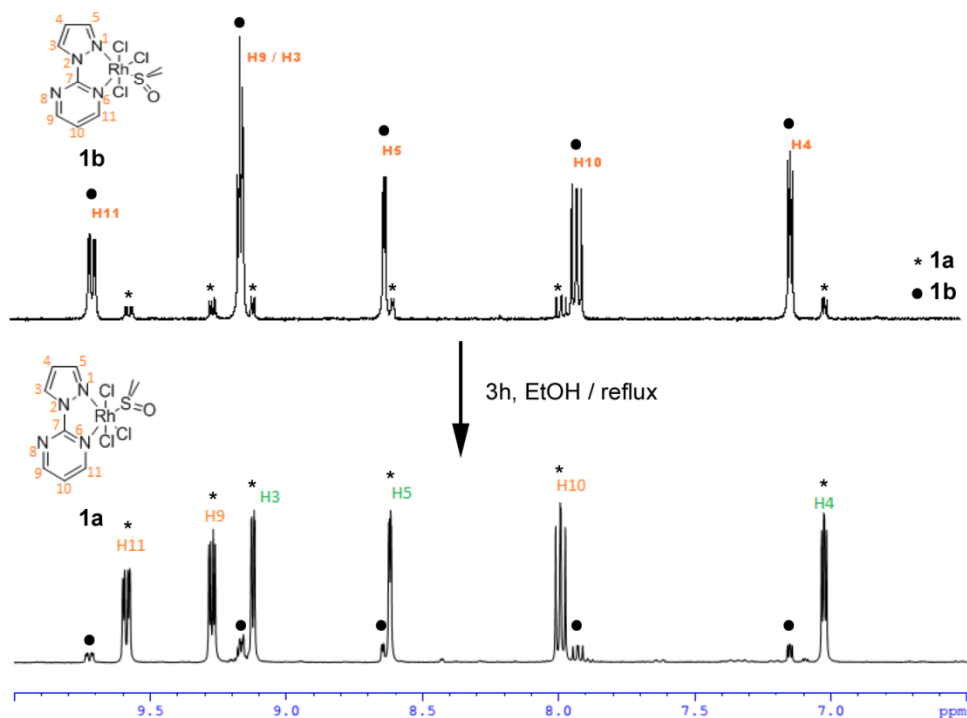

Fig. S1  $^1\text{H-NMR}$  spectra in DMSO- $D_6$  of reaction mixture at the initial reaction stage and at the final stage, showing the conversion of the *cis* into the *trans* isomer.

### 3. Figures S1-S3

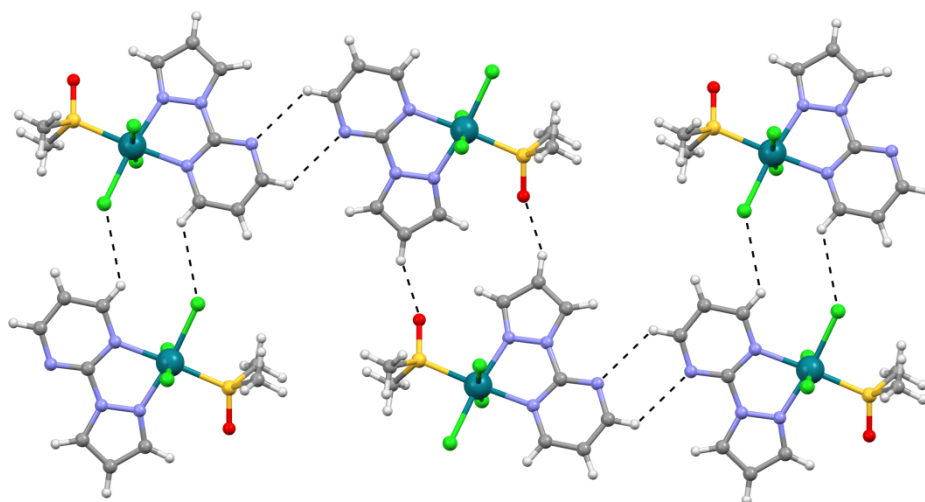

**Fig. S2** 2D plane observed in the solid state of compound **1a**. The hydrogen bonds are represented by dashed lines.

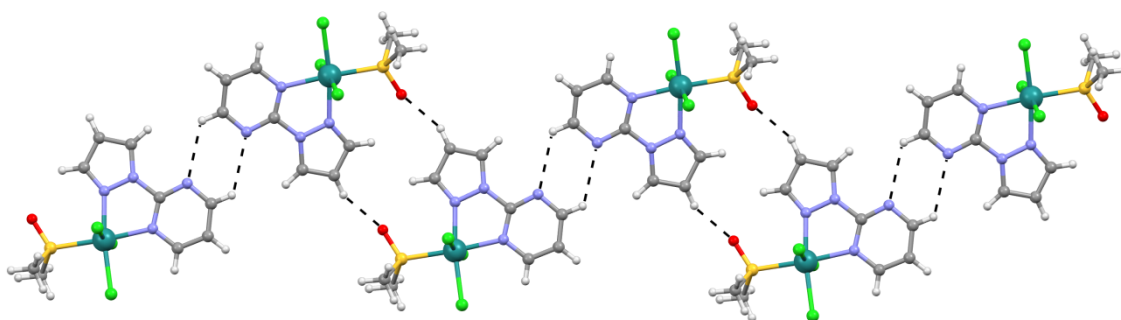

**Fig. S3** 1D ribbon observed in the solid state of compound **2a**. The hydrogen bonds are represented by dashed lines.

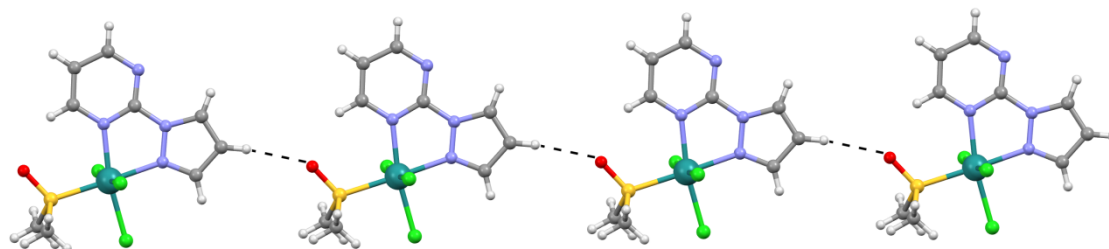

**Fig. S4** 1D infinite chain observed in the solid state of compound **2b**. The hydrogen bonds are represented by dashed lines.

#### 4. Cartesian Coordinates.

##### 1a.

|    |            |            |            |
|----|------------|------------|------------|
| S  | -0.7888311 | 0.1066504  | -2.5278058 |
| O  | -2.2424067 | 0.3947538  | -2.4398329 |
| C  | -0.5397337 | -1.3653598 | -3.5287299 |
| H  | -1.0153208 | -2.1908264 | -2.9870074 |
| H  | 0.5441684  | -1.5301074 | -3.5944515 |
| H  | -1.0091698 | -1.1754995 | -4.5036483 |
| C  | -0.0060814 | 1.3440422  | -3.5706587 |
| H  | -0.5161736 | 1.3145166  | -4.5429821 |
| H  | 1.0597355  | 1.0856801  | -3.6323628 |
| H  | -0.1327942 | 2.3045394  | -3.0582623 |
| Cl | -0.1316717 | -2.4098001 | -0.4275828 |
| Cl | 2.3232712  | -0.5076296 | -1.8011280 |
| Cl | 0.8035371  | 2.2478337  | -0.5130603 |
| N  | -0.8734699 | 0.2076549  | 1.9863048  |
| N  | -1.2179361 | 0.2482699  | 0.6632834  |
| C  | -2.5209542 | 0.4966572  | 0.6185407  |
| H  | -3.0027763 | 0.5697690  | -0.3521780 |
| C  | -3.0345858 | 0.6204587  | 1.9354814  |
| H  | -4.0614571 | 0.8215401  | 2.2182880  |
| C  | -1.9652419 | 0.4320134  | 2.7826175  |
| H  | -1.8562722 | 0.4314603  | 3.8605971  |
| N  | 0.7912010  | -0.0775097 | 3.6052710  |
| C  | 0.4549419  | -0.0438305 | 2.3228061  |
| N  | 1.2735188  | -0.2293794 | 1.2661748  |
| C  | 2.5669050  | -0.4718633 | 1.5236090  |
| H  | 3.1951411  | -0.6139477 | 0.6422085  |
| C  | 3.0233757  | -0.5271047 | 2.8385047  |
| H  | 4.0712229  | -0.7228353 | 3.0578901  |
| C  | 2.0873543  | -0.3222255 | 3.8538190  |
| H  | 2.3762106  | -0.3524107 | 4.9069751  |
| Rh | 0.3442933  | -0.0855101 | -0.6026807 |

##### 2a.

|    |            |            |            |
|----|------------|------------|------------|
| S  | -0.7822640 | 0.1045991  | -2.5358298 |
| O  | -2.2416917 | 0.3923425  | -2.4590036 |
| C  | -0.5430955 | -1.3579066 | -3.5632658 |
| H  | -1.0108024 | -2.1929161 | -3.0296137 |
| H  | 0.5394968  | -1.5211381 | -3.6516395 |
| H  | -1.0251029 | -1.1632984 | -4.5309137 |
| C  | -0.0158224 | 1.3347609  | -3.6088419 |
| H  | -0.5426094 | 1.3046803  | -4.5719913 |
| H  | 1.0478018  | 1.0746268  | -3.6966699 |
| H  | -0.1299208 | 2.3012899  | -3.1051331 |
| Cl | -0.1845399 | -2.3738203 | -0.4232479 |



|    |            |            |            |
|----|------------|------------|------------|
| Cl | 2.3462868  | -0.5001272 | -1.7929662 |
| Cl | 0.7217099  | 2.2441579  | -0.5043918 |
| N  | -0.8644499 | 0.2061892  | 2.0042243  |
| N  | -1.2064593 | 0.2448982  | 0.6792966  |
| C  | -2.5116962 | 0.4959255  | 0.6319246  |
| H  | -2.9860794 | 0.5675274  | -0.3436163 |
| C  | -3.0262483 | 0.6223741  | 1.9450438  |
| H  | -4.0526049 | 0.8256404  | 2.2283108  |
| C  | -1.9556101 | 0.4331435  | 2.7954304  |
| H  | -1.8505846 | 0.4347362  | 3.8739872  |
| N  | 0.7949701  | -0.0808761 | 3.6245074  |
| C  | 0.4668005  | -0.0457181 | 2.3408886  |
| N  | 1.2853904  | -0.2290002 | 1.2785300  |
| C  | 2.5790178  | -0.4734463 | 1.5542541  |
| H  | 3.2183408  | -0.6161394 | 0.6814793  |
| C  | 3.0283108  | -0.5312570 | 2.8703874  |
| H  | 4.0751592  | -0.7289289 | 3.0937062  |
| C  | 2.0890324  | -0.3269071 | 3.8834642  |
| H  | 2.3715418  | -0.3586937 | 4.9381026  |
| Ru | 0.3657226  | -0.0867185 | -0.6064130 |

**3a.**

|    |            |            |            |
|----|------------|------------|------------|
| S  | -0.7979732 | 0.1084955  | -2.5259875 |
| O  | -2.2529355 | 0.3960784  | -2.4482853 |
| C  | -0.5477723 | -1.3622144 | -3.5317356 |
| H  | -1.0180298 | -2.1890818 | -2.9874214 |
| H  | 0.5368416  | -1.5232411 | -3.5988732 |
| H  | -1.0201356 | -1.1757958 | -4.5052674 |
| C  | -0.0161899 | 1.3445955  | -3.5741219 |
| H  | -0.5286415 | 1.3190839  | -4.5446901 |
| H  | 1.0489866  | 1.0832184  | -3.6381848 |
| H  | -0.1376021 | 2.3043767  | -3.0590021 |
| Cl | -0.1079667 | -2.4270027 | -0.4295976 |
| Cl | 2.3409194  | -0.5108826 | -1.8035300 |
| Cl | 0.8333052  | 2.2547005  | -0.5170428 |
| N  | -0.8720868 | 0.2079497  | 1.9941544  |
| N  | -1.2104910 | 0.2467072  | 0.6642299  |
| C  | -2.5171151 | 0.4958706  | 0.6140502  |
| H  | -2.9894264 | 0.5668566  | -0.3615521 |
| C  | -3.0334837 | 0.6204647  | 1.9286709  |
| H  | -4.0616613 | 0.8217489  | 2.2063626  |
| C  | -1.9699104 | 0.4332969  | 2.7826880  |
| H  | -1.8679290 | 0.4341386  | 3.8612036  |
| N  | 0.7923218  | -0.0778383 | 3.6126886  |
| C  | 0.4533038  | -0.0435760 | 2.3321767  |
| N  | 1.2726694  | -0.2297814 | 1.2702488  |
| C  | 2.5691819  | -0.4726705 | 1.5304538  |
| H  | 3.1953390  | -0.6141372 | 0.6478244  |

|    |           |            |            |
|----|-----------|------------|------------|
| C  | 3.0236716 | -0.5274135 | 2.8442407  |
| H  | 4.0716620 | -0.7230289 | 3.0628088  |
| C  | 2.0883757 | -0.3226402 | 3.8608287  |
| H  | 2.3778957 | -0.3530524 | 4.9136547  |
| Ir | 0.3448764 | -0.0852254 | -0.6009932 |

**1b.**

|    |            |            |            |
|----|------------|------------|------------|
| S  | -0.8077742 | 0.0740377  | -2.3967506 |
| O  | -2.2461714 | 0.3730161  | -2.1510186 |
| C  | -0.6925046 | -1.3899344 | -3.4320758 |
| H  | -1.1131663 | -2.2162673 | -2.8479307 |
| H  | 0.3750595  | -1.5650274 | -3.6226476 |
| H  | -1.2671979 | -1.1835270 | -4.3452347 |
| C  | -0.1466844 | 1.3129128  | -3.5183192 |
| H  | -0.7669743 | 1.2881736  | -4.4243306 |
| H  | 0.9034248  | 1.0504344  | -3.7050334 |
| H  | -0.2086218 | 2.2718879  | -2.9913701 |
| Cl | 0.0378438  | -2.4566557 | -0.4072215 |
| Cl | 2.3507188  | -0.5654093 | -2.0636477 |
| Cl | 1.0008233  | 2.1944040  | -0.5700938 |
| N  | 1.0971031  | -0.1351823 | 2.2177490  |
| C  | 3.0190535  | -0.5621309 | 1.3335721  |
| H  | 3.7182367  | -0.7395222 | 0.5220813  |
| C  | 3.1975500  | -0.5312015 | 2.7413664  |
| H  | 4.1202095  | -0.6905825 | 3.2875081  |
| C  | 1.9567625  | -0.2571719 | 3.2770583  |
| H  | 1.5906295  | -0.1363032 | 4.2894971  |
| N  | -0.9092454 | 0.3127909  | 3.3180286  |
| C  | -0.2692904 | 0.1367679  | 2.1724865  |
| C  | -2.1174958 | 0.4429734  | 0.8420486  |
| H  | -2.5219195 | 0.4789559  | -0.1733403 |
| C  | -2.8776202 | 0.6408556  | 1.9924938  |
| H  | -3.9441790 | 0.8453824  | 1.9211667  |
| C  | -2.2235725 | 0.5672624  | 3.2214888  |
| H  | -2.7562380 | 0.7140901  | 4.1637400  |
| N  | 1.7494953  | -0.3222331 | 1.0393128  |
| N  | -0.7994994 | 0.1897007  | 0.9242875  |
| Rh | 0.5512448  | -0.1424972 | -0.6148710 |

**2b.**

|   |            |            |            |
|---|------------|------------|------------|
| S | -0.7951405 | 0.0680080  | -2.4078818 |
| O | -2.2402509 | 0.3630284  | -2.1668741 |
| C | -0.6926872 | -1.3826333 | -3.4732383 |
| H | -1.1030363 | -2.2208486 | -2.8987685 |
| H | 0.3708889  | -1.5530897 | -3.6892345 |
| H | -1.2814411 | -1.1716875 | -4.3761166 |
| C | -0.1582705 | 1.3057928  | -3.5538673 |
| H | -0.7948858 | 1.2851836  | -4.4483826 |

|    |            |            |            |
|----|------------|------------|------------|
| H  | 0.8864694  | 1.0435225  | -3.7691102 |
| H  | -0.2083308 | 2.2682374  | -3.0321780 |
| Cl | -0.0330828 | -2.4140476 | -0.3842580 |
| Cl | 2.3768404  | -0.5644028 | -2.0610557 |
| Cl | 0.8999891  | 2.1846105  | -0.5357569 |
| N  | 1.1066140  | -0.1363485 | 2.2341219  |
| C  | 3.0326933  | -0.5678321 | 1.3648667  |
| H  | 3.7416949  | -0.7486784 | 0.5627383  |
| C  | 3.2028928  | -0.5343557 | 2.7736219  |
| H  | 4.1216387  | -0.6940686 | 3.3264347  |
| C  | 1.9598878  | -0.2574684 | 3.3005603  |
| H  | 1.5875093  | -0.1338792 | 4.3102978  |
| N  | -0.8987765 | 0.3168599  | 3.3350401  |
| C  | -0.2580076 | 0.1352689  | 2.1882597  |
| C  | -2.1082624 | 0.4396853  | 0.8552688  |
| H  | -2.5066647 | 0.4724608  | -0.1639746 |
| C  | -2.8678851 | 0.6432665  | 2.0042592  |
| H  | -3.9340741 | 0.8504267  | 1.9347354  |
| C  | -2.2119171 | 0.5723798  | 3.2339485  |
| H  | -2.7456778 | 0.7240504  | 4.1750985  |
| N  | 1.7650595  | -0.3268563 | 1.0527676  |
| N  | -0.7900733 | 0.1835960  | 0.9415163  |
| Ru | 0.5762863  | -0.1501807 | -0.6328389 |

**3b.**

|    |            |            |            |
|----|------------|------------|------------|
| S  | -0.8183001 | 0.0751840  | -2.3894202 |
| O  | -2.2595569 | 0.3717540  | -2.1547677 |
| C  | -0.7018955 | -1.3870793 | -3.4302182 |
| H  | -1.1143659 | -2.2157793 | -2.8434915 |
| H  | 0.3658200  | -1.5569880 | -3.6255664 |
| H  | -1.2823694 | -1.1842575 | -4.3398597 |
| C  | -0.1606510 | 1.3146455  | -3.5152792 |
| H  | -0.7851891 | 1.2951254  | -4.4178550 |
| H  | 0.8881135  | 1.0498016  | -3.7071609 |
| H  | -0.2160670 | 2.2721610  | -2.9848512 |
| Cl | 0.0743487  | -2.4775086 | -0.4115482 |
| Cl | 2.3631369  | -0.5677358 | -2.0734214 |
| Cl | 1.0426449  | 2.1987130  | -0.5779004 |
| N  | 1.0978498  | -0.1351020 | 2.2274047  |
| C  | 3.0241305  | -0.5631378 | 1.3432127  |
| H  | 3.7208633  | -0.7398593 | 0.5297413  |
| C  | 3.1991415  | -0.5323407 | 2.7492695  |
| H  | 4.1209856  | -0.6919753 | 3.2965280  |
| C  | 1.9573776  | -0.2581663 | 3.2847482  |
| H  | 1.5913483  | -0.1378317 | 4.2972319  |
| N  | -0.9144326 | 0.3135706  | 3.3143707  |
| C  | -0.2689842 | 0.1367528  | 2.1756535  |
| C  | -2.1141302 | 0.4434809  | 0.8333981  |

|    |            |            |            |
|----|------------|------------|------------|
| H  | -2.5133693 | 0.4793932  | -0.1836813 |
| C  | -2.8743855 | 0.6417272  | 1.9809008  |
| H  | -3.9403901 | 0.8471386  | 1.9028517  |
| C  | -2.2289499 | 0.5689044  | 3.2149290  |
| H  | -2.7652952 | 0.7161727  | 4.1545828  |
| N  | 1.7516335  | -0.3222562 | 1.0481088  |
| N  | -0.7896268 | 0.1875813  | 0.9157797  |
| Ir | 0.5505646  | -0.1420883 | -0.6136901 |

**1a-intermediate.**

|    |            |            |            |
|----|------------|------------|------------|
| Rh | -0.9698649 | 0.1217686  | -0.4808475 |
| S  | -1.6688382 | 0.6210784  | -2.4407969 |
| O  | -2.4657898 | 1.8278007  | -2.6580935 |
| C  | -2.5767492 | -0.7342029 | -3.1564381 |
| H  | -3.5151406 | -0.7956375 | -2.6121995 |
| H  | -2.0048954 | -1.6521791 | -3.0344050 |
| H  | -2.7376640 | -0.4657597 | -4.2021093 |
| C  | -0.3069035 | 0.6813297  | -3.5869810 |
| H  | -0.7550974 | 0.7626228  | -4.5788580 |
| H  | 0.3008955  | -0.2133810 | -3.4657906 |
| H  | 0.2663481  | 1.5687087  | -3.3327179 |
| Cl | -2.8504820 | -1.2143504 | -0.0968608 |
| Cl | 0.0496081  | -1.7774206 | -1.4143502 |
| Cl | 0.8725186  | 1.4637362  | -0.8053313 |
| N  | 2.0512908  | -0.0873565 | 1.5124785  |
| C  | 4.0502799  | 0.2772909  | 0.9398235  |
| H  | 4.9931820  | 0.8021757  | 0.9002704  |
| C  | 3.6552240  | -0.8909867 | 0.2648422  |
| H  | 4.2252644  | -1.4978380 | -0.4194343 |
| C  | 2.3513114  | -1.1026214 | 0.6581705  |
| H  | 1.6158987  | -1.8392784 | 0.3845749  |
| N  | 1.0338641  | 0.4186447  | 3.5050287  |
| C  | 0.8586159  | 0.0787792  | 2.2312570  |
| C  | -1.3966044 | -0.1425380 | 2.4282578  |
| H  | -2.3394360 | -0.3690715 | 1.9519872  |
| C  | -1.3046090 | 0.1560604  | 3.7752923  |
| H  | -2.1913603 | 0.1664783  | 4.3948632  |
| C  | -0.0551602 | 0.4890252  | 4.2667970  |
| H  | 0.0978493  | 0.7981720  | 5.2967453  |
| N  | 3.0737823  | 0.7653004  | 1.7172941  |
| N  | -0.3172570 | -0.1551196 | 1.6192765  |
| Cl | -2.0400810 | 1.9387696  | 0.4382551  |

**2a-intermediate.**

|   |            |            |            |
|---|------------|------------|------------|
| S | -1.7523876 | 0.6496144  | -2.5318997 |
| O | -2.5674405 | 1.8647384  | -2.7699352 |
| C | -2.6686676 | -0.7452561 | -3.2423133 |
| H | -3.5900162 | -0.8357983 | -2.6572087 |

|    |            |            |            |
|----|------------|------------|------------|
| H  | -2.0539924 | -1.6476735 | -3.1290205 |
| H  | -2.8681115 | -0.4864256 | -4.2920518 |
| C  | -0.3912397 | 0.6874095  | -3.7314380 |
| H  | -0.8532425 | 0.7889414  | -4.7234389 |
| H  | 0.1860050  | -0.2394743 | -3.6180717 |
| H  | 0.2224260  | 1.5556264  | -3.4685498 |
| Cl | -2.8678939 | -1.2967579 | -0.0758047 |
| Cl | 0.0647440  | -1.8239060 | -1.4843592 |
| Cl | 0.9265807  | 1.4757208  | -0.8747118 |
| N  | 2.1252420  | -0.0692474 | 1.6135750  |
| C  | 4.1853241  | 0.1698100  | 1.1592911  |
| H  | 5.1849890  | 0.5963059  | 1.2138577  |
| C  | 3.7094341  | -0.8693512 | 0.3159824  |
| H  | 4.2516280  | -1.4380303 | -0.4321438 |
| C  | 2.3758333  | -0.9923585 | 0.6330662  |
| H  | 1.5818700  | -1.6097359 | 0.2226915  |
| N  | 1.0502881  | 0.5268982  | 3.5669062  |
| C  | 0.9164698  | 0.1143389  | 2.3025846  |
| C  | -1.3386985 | -0.1993439 | 2.4827854  |
| H  | -2.2697805 | -0.4851982 | 1.9937620  |
| C  | -1.2844880 | 0.1382246  | 3.8303374  |
| H  | -2.1844273 | 0.1179403  | 4.4433949  |
| C  | -0.0545442 | 0.5696575  | 4.3141185  |
| H  | 0.0658122  | 0.9480169  | 5.3347221  |
| N  | 3.2372466  | 0.6526184  | 1.9565759  |
| N  | -0.2509261 | -0.1808514 | 1.6733275  |
| Cl | -2.1128221 | 1.9307409  | 0.4924187  |
| Ru | -0.9752143 | 0.1328060  | -0.5184498 |

**3a-intermediate.**

|    |            |            |            |
|----|------------|------------|------------|
| S  | -1.6746536 | 0.6232935  | -2.4481723 |
| O  | -2.4792663 | 1.8223888  | -2.6931269 |
| C  | -2.5739589 | -0.7437123 | -3.1575595 |
| H  | -3.5114371 | -0.8101163 | -2.6111065 |
| H  | -1.9964569 | -1.6582668 | -3.0307490 |
| H  | -2.7434654 | -0.4898120 | -4.2051697 |
| C  | -0.3109983 | 0.6727758  | -3.5951290 |
| H  | -0.7471320 | 0.7625540  | -4.5912920 |
| H  | 0.2883051  | -0.2286034 | -3.4744049 |
| H  | 0.2738117  | 1.5518458  | -3.3354851 |
| Cl | -2.8435411 | -1.2098436 | -0.0600939 |
| Cl | 0.0585912  | -1.7726616 | -1.3620981 |
| Cl | 0.8991255  | 1.4927957  | -0.7934982 |
| N  | 2.0382274  | -0.0942355 | 1.4887077  |
| C  | 4.0359512  | 0.3005957  | 0.9303573  |
| H  | 4.9674403  | 0.8451942  | 0.8889318  |
| C  | 3.6725986  | -0.8885118 | 0.2747106  |
| H  | 4.2626682  | -1.4968312 | -0.3910351 |

|    |            |            |            |
|----|------------|------------|------------|
| C  | 2.3698966  | -1.1213252 | 0.6605357  |
| H  | 1.6550994  | -1.8819683 | 0.3994471  |
| N  | 1.0350677  | 0.3447848  | 3.4973241  |
| C  | 0.8469201  | 0.0624206  | 2.2120069  |
| C  | -1.4186269 | -0.0859109 | 2.4210796  |
| H  | -2.3726485 | -0.2642611 | 1.9484001  |
| C  | -1.3064934 | 0.1601098  | 3.7760625  |
| H  | -2.1901408 | 0.1803521  | 4.3997782  |
| C  | -0.0434606 | 0.4253874  | 4.2719986  |
| H  | 0.1287823  | 0.6863617  | 5.3120386  |
| N  | 3.0419942  | 0.7818147  | 1.6892133  |
| N  | -0.3442721 | -0.1104492 | 1.5995480  |
| Cl | -2.0454197 | 1.9915776  | 0.4517019  |
| Ir | -0.9725074 | 0.1522570  | -0.4729215 |

**1b-intermediate.**

|    |            |            |            |
|----|------------|------------|------------|
| Rh | 0.0515510  | 0.0292898  | -1.0199647 |
| S  | -1.3370113 | 0.5593179  | -2.5813927 |
| O  | -2.4876331 | 1.4269767  | -2.3133593 |
| C  | -1.9660435 | -0.8957843 | -3.3943651 |
| H  | -2.6267469 | -1.3820756 | -2.6819415 |
| H  | -1.1335292 | -1.5513873 | -3.6436680 |
| H  | -2.5086338 | -0.5395546 | -4.2719539 |
| C  | -0.4529610 | 1.2705665  | -3.9539587 |
| H  | -1.1753965 | 1.3638087  | -4.7668576 |
| H  | 0.3886848  | 0.6260572  | -4.2028694 |
| H  | -0.0968354 | 2.2412398  | -3.6189182 |
| Cl | -1.2642009 | -1.8071262 | -0.4914454 |
| Cl | 1.2317302  | -1.2820967 | -2.5597665 |
| Cl | 1.3843561  | 1.8754289  | -1.4914643 |
| N  | 1.5497494  | -0.1410989 | 1.7339717  |
| C  | 2.8338650  | -0.4750042 | 0.0562663  |
| H  | 3.0649138  | -0.6265845 | -0.9841859 |
| C  | 3.6658758  | -0.2752945 | 1.1606531  |
| H  | 4.7431348  | -0.2770813 | 1.1789021  |
| C  | 2.8148615  | -0.0548638 | 2.2249981  |
| H  | 2.9701894  | 0.1299864  | 3.2750399  |
| N  | 0.2796476  | 0.8505225  | 3.4062887  |
| C  | 0.3794897  | -0.1496060 | 2.5352906  |
| C  | -1.5667419 | -1.1329181 | 3.0367449  |
| H  | -2.2543885 | -1.9570739 | 2.8766396  |
| C  | -1.8672397 | -0.0734060 | 3.8828182  |
| H  | -2.8163307 | -0.0113140 | 4.3995064  |
| C  | -0.8677322 | 0.8712021  | 4.0885251  |
| H  | -0.9866850 | 1.6780934  | 4.8050838  |
| N  | 1.5383107  | -0.4021342 | 0.4183103  |
| N  | -0.4067718 | -1.2018833 | 2.3822908  |
| Cl | -1.0814783 | 1.3137977  | 0.5147817  |

**2b-intermediate.**

|    |            |            |            |
|----|------------|------------|------------|
| S  | -1.3808720 | 0.6027745  | -2.6876915 |
| O  | -2.5301400 | 1.5180952  | -2.4706051 |
| C  | -2.0339149 | -0.8858432 | -3.4962372 |
| H  | -2.6941454 | -1.3672648 | -2.7667990 |
| H  | -1.1826506 | -1.5402231 | -3.7267967 |
| H  | -2.5753300 | -0.5473194 | -4.3913013 |
| C  | -0.4513135 | 1.2438071  | -4.1075320 |
| H  | -1.1665999 | 1.3430834  | -4.9363131 |
| H  | 0.3602511  | 0.5348144  | -4.3197559 |
| H  | -0.0387548 | 2.2089656  | -3.7946250 |
| Cl | -1.3034812 | -1.8443912 | -0.5104306 |
| Cl | 1.2679921  | -1.3432933 | -2.6078384 |
| Cl | 1.4695264  | 1.8769410  | -1.5849967 |
| N  | 1.5481809  | -0.1302278 | 1.7928678  |
| C  | 2.8468544  | -0.4625667 | 0.1122411  |
| H  | 3.0904381  | -0.6266383 | -0.9318446 |
| C  | 3.6802695  | -0.2080030 | 1.2202610  |
| H  | 4.7640496  | -0.1778323 | 1.2396289  |
| C  | 2.8172115  | 0.0126947  | 2.2742670  |
| H  | 2.9676576  | 0.2303739  | 3.3253755  |
| N  | 0.3344685  | 0.7732273  | 3.5645424  |
| C  | 0.3851250  | -0.1606853 | 2.6026890  |
| C  | -1.5950618 | -1.1148341 | 3.0811529  |
| H  | -2.3198014 | -1.9079950 | 2.8764073  |
| C  | -1.8470270 | -0.1119147 | 4.0203529  |
| H  | -2.7892580 | -0.0565033 | 4.5654195  |
| C  | -0.8001910 | 0.7792186  | 4.2716419  |
| H  | -0.8734562 | 1.5312878  | 5.0634576  |
| N  | 1.5536997  | -0.4222813 | 0.4562718  |
| N  | -0.4510376 | -1.1766400 | 2.3957841  |
| Cl | -1.0834667 | 1.3914464  | 0.5228015  |
| Ru | 0.0307774  | 0.0377269  | -1.0523948 |

**3b-intermediate.**

|    |            |            |            |
|----|------------|------------|------------|
| S  | -1.3381608 | 0.5647460  | -2.5867599 |
| O  | -2.4884274 | 1.4400794  | -2.3332213 |
| C  | -1.9789928 | -0.8911015 | -3.3949013 |
| H  | -2.6372905 | -1.3742869 | -2.6773196 |
| H  | -1.1508663 | -1.5524544 | -3.6465892 |
| H  | -2.5274210 | -0.5434066 | -4.2719134 |
| C  | -0.4569110 | 1.2605585  | -3.9716280 |
| H  | -1.1767263 | 1.3598440  | -4.7857427 |
| H  | 0.3791411  | 0.6083667  | -4.2220521 |
| H  | -0.0890699 | 2.2299164  | -3.6436255 |
| Cl | -1.2413710 | -1.8296903 | -0.4796981 |

|    |            |            |            |
|----|------------|------------|------------|
| Cl | 1.2565339  | -1.2916106 | -2.5464467 |
| Cl | 1.4130812  | 1.8862534  | -1.4941826 |
| N  | 1.5437158  | -0.1306930 | 1.7302743  |
| C  | 2.8398927  | -0.4565851 | 0.0549047  |
| H  | 3.0770144  | -0.5959645 | -0.9858959 |
| C  | 3.6635172  | -0.2790016 | 1.1676357  |
| H  | 4.7404534  | -0.2909366 | 1.1933406  |
| C  | 2.8068738  | -0.0636094 | 2.2281392  |
| H  | 2.9567685  | 0.1066554  | 3.2813737  |
| N  | 0.2785912  | 0.8493595  | 3.4129713  |
| C  | 0.3730549  | -0.1434896 | 2.5330981  |
| C  | -1.5687287 | -1.1327510 | 3.0367418  |
| H  | -2.2560026 | -1.9566293 | 2.8738658  |
| C  | -1.8657517 | -0.0795945 | 3.8916781  |
| H  | -2.8123546 | -0.0218231 | 4.4133911  |
| C  | -0.8653275 | 0.8637224  | 4.1008444  |
| H  | -0.9810592 | 1.6641967  | 4.8250325  |
| N  | 1.5404778  | -0.3764855 | 0.4091829  |
| N  | -0.4109862 | -1.1962313 | 2.3772395  |
| Cl | -1.0756651 | 1.3328959  | 0.5373133  |
| Ir | 0.0519965  | 0.0397506  | -1.0270507 |

**I1b-intermediate.**

|    |             |             |             |
|----|-------------|-------------|-------------|
| S  | -1.82703300 | 0.65551220  | -2.49282710 |
| O  | -2.97523070 | 1.55192070  | -2.74643460 |
| C  | -2.14738780 | -0.91193460 | -3.33066050 |
| H  | -3.02321780 | -1.34473500 | -2.83488510 |
| H  | -1.26731530 | -1.55078100 | -3.17583880 |
| H  | -2.33601160 | -0.66996510 | -4.38623950 |
| C  | -0.43459210 | 1.23463380  | -3.48643640 |
| H  | -0.78758680 | 1.27370620  | -4.52676270 |
| H  | 0.39297290  | 0.52996660  | -3.32887900 |
| H  | -0.17388990 | 2.22396310  | -3.09418530 |
| Cl | -2.55227200 | -1.65573380 | -0.19296870 |
| Cl | 0.58252830  | -1.19187770 | -1.36608270 |
| Cl | 0.32117700  | 2.14819850  | -0.45706860 |
| N  | 1.91931670  | -0.36130750 | 1.36430140  |
| C  | 3.26201361  | -1.78760187 | 0.54303671  |
| H  | 3.61331338  | -2.76085470 | 0.20802800  |
| C  | 3.90931942  | -0.53327791 | 0.45676164  |
| H  | 4.87767933  | -0.30123107 | 0.02552177  |
| C  | 3.01490485  | 0.36463726  | 1.00991669  |
| H  | 3.02195965  | 1.44162416  | 1.12062831  |
| N  | 1.06336250  | 0.31353030  | 3.40995950  |
| C  | 0.78922880  | 0.00239300  | 2.14572210  |
| C  | -1.47171580 | -0.14866210 | 2.50239690  |
| H  | -2.45093050 | -0.35672970 | 2.07806120  |
| C  | -1.26529720 | 0.08164410  | 3.85981570  |



|    |             |             |             |
|----|-------------|-------------|-------------|
| H  | -2.10129670 | 0.05642080  | 4.55749150  |
| C  | 0.02734560  | 0.39975360  | 4.25691450  |
| H  | 0.26114440  | 0.70254390  | 5.28202680  |
| N  | 2.05767040  | -1.69414156 | 1.10954966  |
| N  | -0.44769800 | -0.11890560 | 1.61510570  |
| Cl | -2.76929550 | 1.64347120  | 0.52613120  |
| Rh | -1.09296310 | 0.21870040  | -0.41255080 |

**I2b-intermediate.**

|    |             |             |             |
|----|-------------|-------------|-------------|
| S  | -1.82677280 | 0.65610490  | -2.49942440 |
| O  | -2.96836560 | 1.56274070  | -2.77495980 |
| C  | -2.16146330 | -0.90568520 | -3.35613790 |
| H  | -3.03430630 | -1.34280040 | -2.85863020 |
| H  | -1.28407610 | -1.55306000 | -3.22480120 |
| H  | -2.36209650 | -0.65658380 | -4.40775570 |
| C  | -0.43869980 | 1.21481350  | -3.52224230 |
| H  | -0.80533160 | 1.26608070  | -4.55725320 |
| H  | 0.38296560  | 0.49877270  | -3.38888370 |
| H  | -0.15330490 | 2.19939240  | -3.13497950 |
| Cl | -2.56877690 | -1.64402370 | -0.18469980 |
| Cl | 0.57230210  | -1.19391940 | -1.34423840 |
| Cl | 0.33590830  | 2.12097450  | -0.46394620 |
| N  | 1.91820120  | -0.35688290 | 1.37608160  |
| C  | 3.25454956  | -1.77143226 | 0.52306930  |
| H  | 3.59887928  | -2.73736266 | 0.16082951  |
| C  | 3.91593935  | -0.52199798 | 0.48125094  |
| H  | 4.89203338  | -0.28749027 | 0.06906358  |
| C  | 3.02567890  | 0.36661786  | 1.05650109  |
| H  | 3.04979407  | 1.43752365  | 1.21294517  |
| N  | 1.06848990  | 0.31740400  | 3.42313500  |
| C  | 0.78798580  | 0.00335660  | 2.16194370  |
| C  | -1.46644830 | -0.15747080 | 2.52736180  |
| H  | -2.44740720 | -0.37543350 | 2.11374700  |
| C  | -1.25653270 | 0.08017500  | 3.88139330  |
| H  | -2.08998370 | 0.04951680  | 4.58224710  |
| C  | 0.03673820  | 0.40436830  | 4.27592260  |
| H  | 0.27354940  | 0.70946630  | 5.29942720  |
| N  | 2.04539507  | -1.68169936 | 1.08029739  |
| N  | -0.44986070 | -0.12114160 | 1.62632770  |
| Cl | -2.75705330 | 1.63952910  | 0.52803960  |
| Ru | -1.09612300 | 0.21159430  | -0.41278860 |

**I3b-intermediate.**

|   |             |             |             |
|---|-------------|-------------|-------------|
| S | -1.81969070 | 0.65798540  | -2.48655810 |
| O | -2.96743920 | 1.55660310  | -2.73786190 |
| C | -2.14356100 | -0.90489200 | -3.33657350 |
| H | -3.01373250 | -1.34268600 | -2.83502280 |
| H | -1.26100530 | -1.54310170 | -3.19194900 |

|    |             |             |             |
|----|-------------|-------------|-------------|
| H  | -2.34160810 | -0.65845780 | -4.38882330 |
| C  | -0.43168920 | 1.23921080  | -3.48945070 |
| H  | -0.78919580 | 1.28870420  | -4.52721070 |
| H  | 0.39440050  | 0.53027790  | -3.34168800 |
| H  | -0.16428400 | 2.22391040  | -3.08998260 |
| Cl | -2.52639390 | -1.68945760 | -0.18816890 |
| Cl | 0.60422300  | -1.19748900 | -1.36672350 |
| Cl | 0.32771550  | 2.15119600  | -0.44261260 |
| N  | 1.91135350  | -0.35019650 | 1.35927020  |
| C  | 3.23824911  | -1.79296370 | 0.54081146  |
| H  | 3.57867733  | -2.77046517 | 0.20691278  |
| C  | 3.89960729  | -0.54607708 | 0.45277758  |
| H  | 4.87053756  | -0.32563943 | 0.02125183  |
| C  | 3.01530152  | 0.36248726  | 1.00432445  |
| H  | 3.03420487  | 1.43927182  | 1.11382149  |
| N  | 1.05758130  | 0.34892300  | 3.39823060  |
| C  | 0.78573560  | 0.02402870  | 2.14012550  |
| C  | -1.47456040 | -0.16636450 | 2.51006000  |
| H  | -2.45229510 | -0.40472620 | 2.09897080  |
| C  | -1.26207430 | 0.07697460  | 3.86273370  |
| H  | -2.09303260 | 0.03556160  | 4.56565390  |
| C  | 0.02496630  | 0.42845260  | 4.25072460  |
| H  | 0.25806290  | 0.74788330  | 5.27060070  |
| N  | 2.03468711  | -1.68519913 | 1.10595431  |
| N  | -0.45663770 | -0.11238830 | 1.60999440  |
| Cl | -2.77256760 | 1.61982910  | 0.55415480  |
| Ir | -1.08647910 | 0.21053510  | -0.41117890 |

**N-Pyrazolyl Pyrimidine.**

|   |            |            |            |
|---|------------|------------|------------|
| N | -0.9376456 | 0.1760041  | -0.3559729 |
| N | -1.3300057 | 0.2639733  | -1.6416705 |
| C | -2.6440921 | 0.5045327  | -1.5622619 |
| H | -3.2081739 | 0.6198702  | -2.4752467 |
| C | -3.0909377 | 0.5698695  | -0.2284239 |
| H | -4.0900428 | 0.7485421  | 0.1339120  |
| C | -1.9636793 | 0.3535059  | 0.5323352  |
| H | -1.7898559 | 0.3085541  | 1.5934638  |
| N | 0.6596218  | -0.1314442 | 1.2862898  |
| C | 0.4085613  | -0.0752408 | -0.0215137 |
| N | 1.2643432  | -0.2257154 | -1.0254830 |
| C | 2.5290459  | -0.4614549 | -0.6646971 |
| H | 3.2387713  | -0.5865933 | -1.4763424 |
| C | 2.9240912  | -0.5441660 | 0.6640930  |
| H | 3.9517807  | -0.7354343 | 0.9420285  |
| C | 1.9310407  | -0.3684819 | 1.6185380  |
| H | 2.1471768  | -0.4163211 | 2.6809518  |

**[H(DMSO)<sub>2</sub>] [trans-RhCl<sub>4</sub>(DMSO)<sub>2</sub>]**

|    |            |            |            |
|----|------------|------------|------------|
| Rh | 0.0001538  | 0.0000092  | -0.0000501 |
| S  | -1.0811443 | 0.1692080  | -1.9635907 |
| O  | -2.1518583 | 1.1567372  | -2.1568487 |
| C  | -1.7259549 | -1.4215670 | -2.4360315 |
| H  | -2.5373114 | -1.6402080 | -1.7461816 |
| H  | -0.9351225 | -2.1633547 | -2.3337160 |
| H  | -2.0874716 | -1.3185504 | -3.4607368 |
| C  | 0.0943107  | 0.3863641  | -3.2829814 |
| H  | -0.4645661 | 0.2922481  | -4.2157873 |
| H  | 0.8797542  | -0.3606615 | -3.1773980 |
| H  | 0.5073685  | 1.3849372  | -3.1637070 |
| Cl | -1.5635930 | -1.5561694 | 0.7279052  |
| Cl | 1.2663359  | -1.7071592 | -0.9289791 |
| Cl | 1.5639544  | 1.5562343  | -0.7280385 |
| Cl | -1.2661431 | 1.7072163  | 0.9288983  |
| S  | 1.0813672  | -0.1691358 | 1.9636049  |
| O  | 2.1522681  | -1.1564371 | 2.1569904  |
| C  | 1.7256968  | 1.4217640  | 2.4362494  |
| H  | 2.0885581  | 1.3182635  | 3.4604292  |
| H  | 2.5359830  | 1.6415175  | 1.7454962  |
| H  | 0.9341953  | 2.1630439  | 2.3354218  |
| C  | -0.0942630 | -0.3866528 | 3.2827932  |
| H  | -0.5058823 | -1.3859102 | 3.1642596  |
| H  | 0.4640538  | -0.2909344 | 4.2157718  |
| H  | -0.8806893 | 0.3591974  | 3.1762267  |

**[H (DMSO)<sub>2</sub>] [trans-RuCl<sub>4</sub> (DMSO)<sub>2</sub>]**

|    |            |            |            |
|----|------------|------------|------------|
| S  | -1.1256003 | 0.1892201  | -2.0250002 |
| O  | -2.2077555 | 1.1830507  | -2.2402278 |
| C  | -1.7593325 | -1.4377327 | -2.5056058 |
| H  | -2.5538467 | -1.6811105 | -1.7914360 |
| H  | -0.9312970 | -2.1534459 | -2.4092848 |
| H  | -2.1357371 | -1.3459507 | -3.5344449 |
| C  | 0.0791877  | 0.3846385  | -3.3625699 |
| H  | -0.4737161 | 0.2940104  | -4.3084881 |
| H  | 0.8440731  | -0.3928071 | -3.2312016 |
| H  | 0.5230252  | 1.3781483  | -3.2342579 |
| Cl | -1.6081909 | -1.6029222 | 0.7556454  |
| Cl | 1.2964663  | -1.7545036 | -0.9661506 |
| Cl | 1.6085212  | 1.6030621  | -0.7558656 |
| Cl | -1.2966441 | 1.7541819  | 0.9662099  |
| S  | 1.1264278  | -0.1885182 | 2.0246834  |
| O  | 2.2104101  | -1.1804960 | 2.2391425  |
| C  | 1.7574333  | 1.4392522  | 2.5062199  |

|    |            |            |            |
|----|------------|------------|------------|
| H  | 2.1345071  | 1.3473393  | 3.5348023  |
| H  | 2.5511668  | 1.6845946  | 1.7918489  |
| H  | 0.9280632  | 2.1535403  | 2.4108657  |
| C  | -0.0779334 | -0.3866971 | 3.3622483  |
| H  | -0.5197514 | -1.3810859 | 3.2337736  |
| H  | 0.4747506  | -0.2950663 | 4.3082018  |
| H  | -0.8444251 | 0.3892031  | 3.2309793  |
| Ru | 0.0001979  | 0.0000947  | -0.0000879 |

**[H(DMSO)<sub>2</sub>] [trans-IrCl<sub>4</sub>(DMSO)<sub>2</sub>]**

|    |            |            |            |
|----|------------|------------|------------|
| S  | -1.1237819 | 0.1910167  | -2.0168158 |
| O  | -2.2012796 | 1.1869825  | -2.2146583 |
| C  | -1.7544689 | -1.4371928 | -2.4808554 |
| H  | -2.5487177 | -1.6716489 | -1.7636112 |
| H  | -0.9226496 | -2.1468049 | -2.3681946 |
| H  | -2.1255671 | -1.3539784 | -3.5119123 |
| C  | 0.0886199  | 0.3928221  | -3.3406798 |
| H  | -0.4573664 | 0.2943612  | -4.2893742 |
| H  | 0.8569776  | -0.3787708 | -3.1925277 |
| H  | 0.5235706  | 1.3893448  | -3.2065072 |
| Cl | -1.6190179 | -1.6133489 | 0.7615360  |
| Cl | 1.3032770  | -1.7680149 | -0.9817707 |
| Cl | 1.6188060  | 1.6134243  | -0.7617887 |
| Cl | -1.3035794 | 1.7682041  | 0.9815024  |
| S  | 1.1237255  | -0.1909416 | 2.0167710  |
| O  | 2.2013019  | -1.1868355 | 2.2144367  |
| C  | 1.7544505  | 1.4372370  | 2.4808856  |
| H  | 2.1259487  | 1.3538487  | 3.5117838  |
| H  | 2.5483945  | 1.6719316  | 1.7633804  |
| H  | 0.9225142  | 2.1467852  | 2.3686845  |
| C  | -0.0884707 | -0.3929728 | 3.3408115  |
| H  | -0.5230460 | -1.3896876 | 3.2068658  |
| H  | 0.4575682  | -0.2941390 | 4.2894398  |
| H  | -0.8571298 | 0.3783083  | 3.1926073  |
| Ir | -0.0000793 | 0.0000696  | -0.0000089 |
